# Supplementary material for: Hypoxia Correlates With Poor Survival and M2 Macrophage Infiltration in Colorectal Cancer
Source: PubMed Central journal article supplement (PMC7714992; doi:10.3389/fonc.2020.566430), 2020-11-20
Supplement: DataSheet_1.pdf [file DataSheet_1.pdf]

A

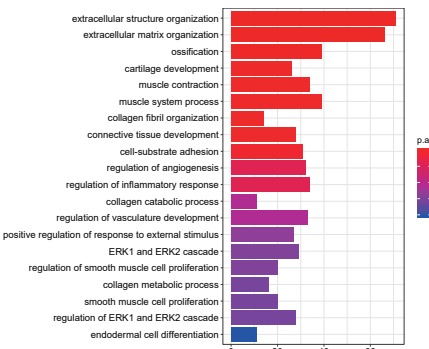

B

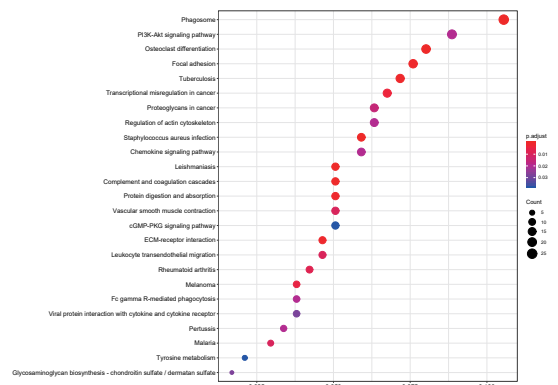

C

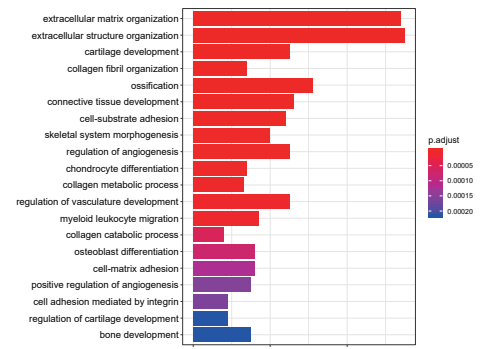

D

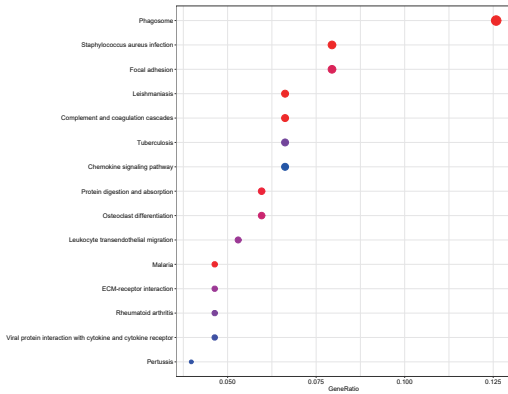

E

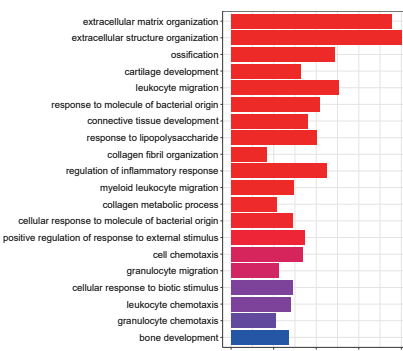

F

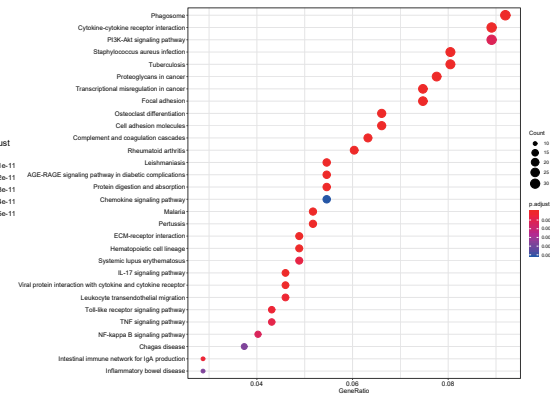

G

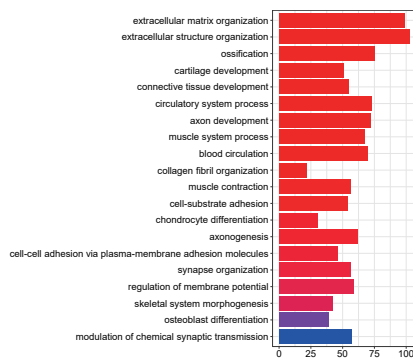

H

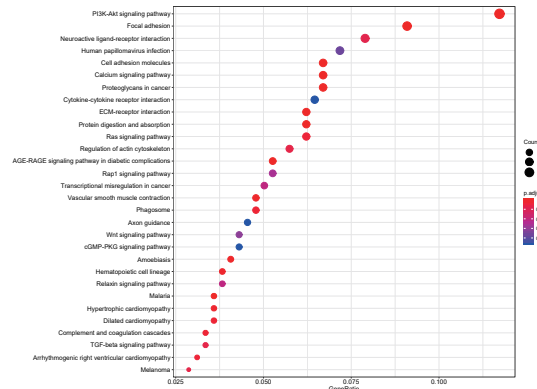

Figure S1. Enrichment of GO terms and KEGG pathways in GSE14333 (A and B), GSE17538 (C and D), GSE39582 (E and F), and TCGA (G and H) under hypoxic conditions.
