# Supplementary material for: Hypoxia Correlates With Poor Survival and M2 Macrophage Infiltration in Colorectal Cancer
Source: PubMed Central journal article supplement (PMC7714992; doi:10.3389/fonc.2020.566430), 2020-11-20
Supplement: DataSheet_4.pdf [file DataSheet_4.pdf]

**A**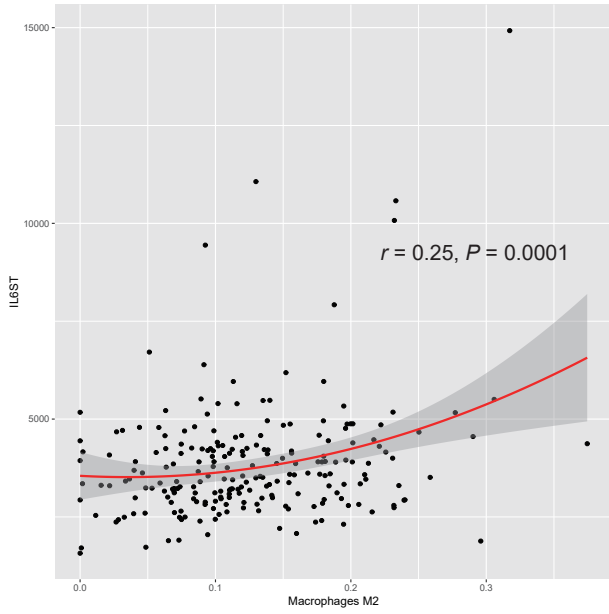**B**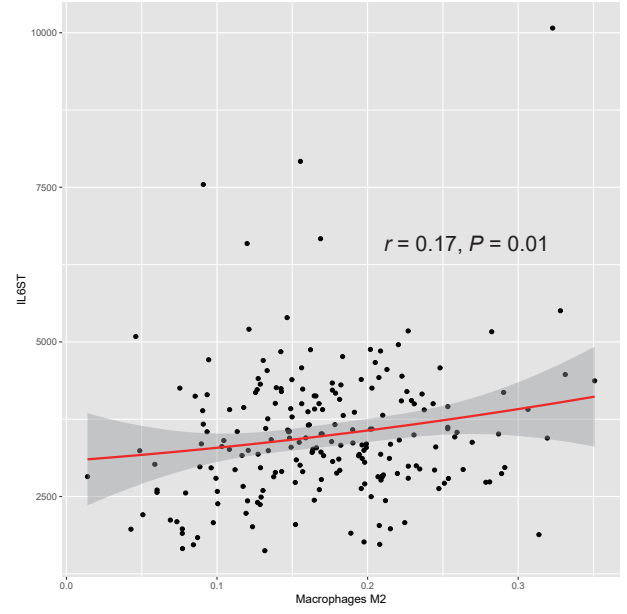**C**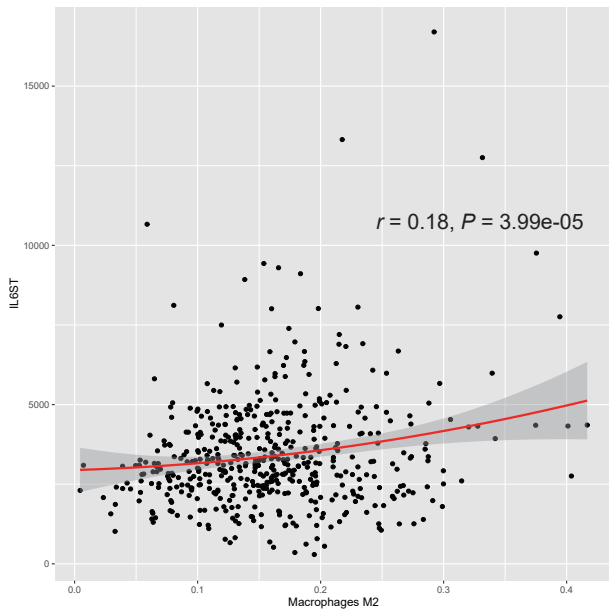**D**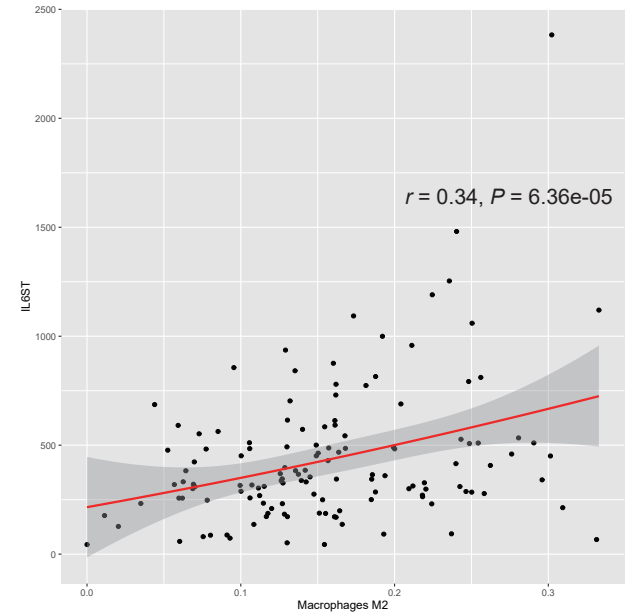

Figure S4. The correlation of IL6ST and M2 macrophage infiltration in GSE14333 (A), GSE17538 (B), GSE39582 (C), and TCGA (D), respectively.
