# Supplementary material for: Hypoxia Correlates With Poor Survival and M2 Macrophage Infiltration in Colorectal Cancer
Source: Front Oncol. 2020 Nov 20;10:566430. doi: 10.3389/fonc.2020.566430 (PMC7714992; doi:10.3389/fonc.2020.566430)
Supplement: Supplementary file 2 [file DataSheet_2.pdf]

A

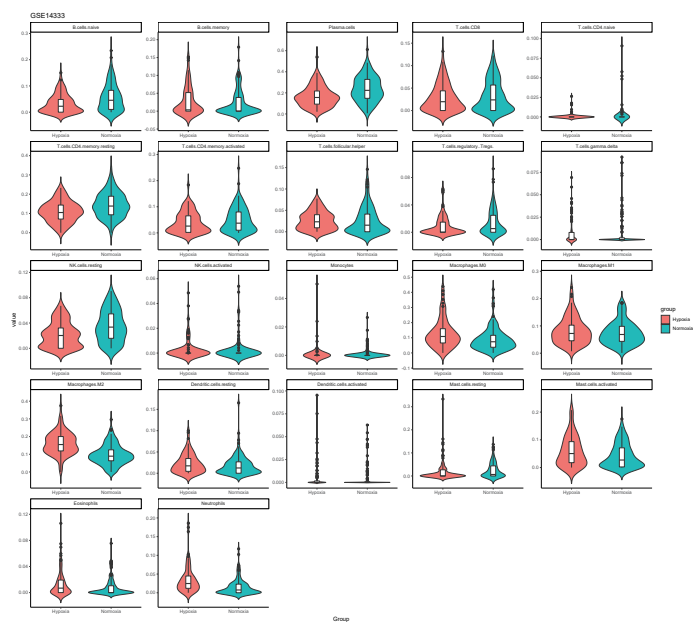

B

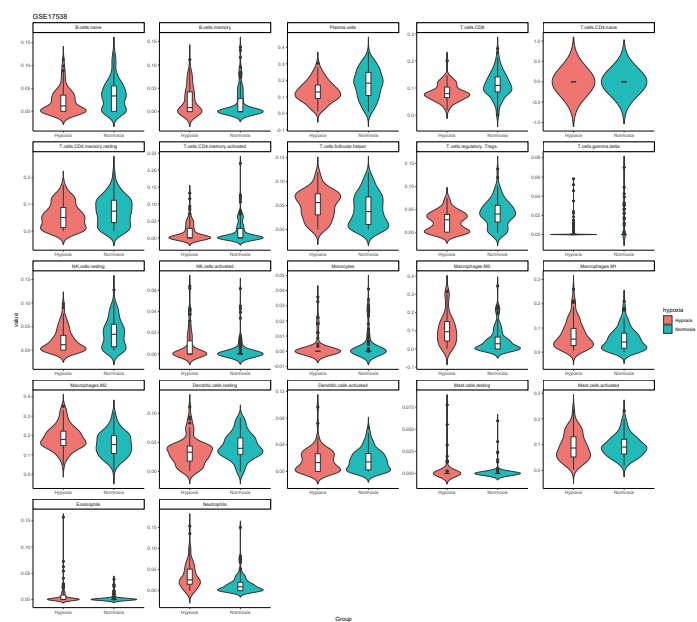

C

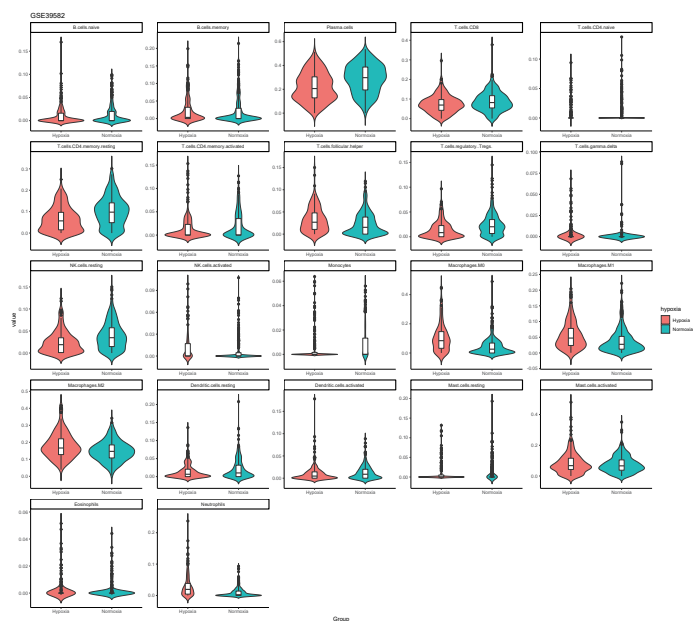

D

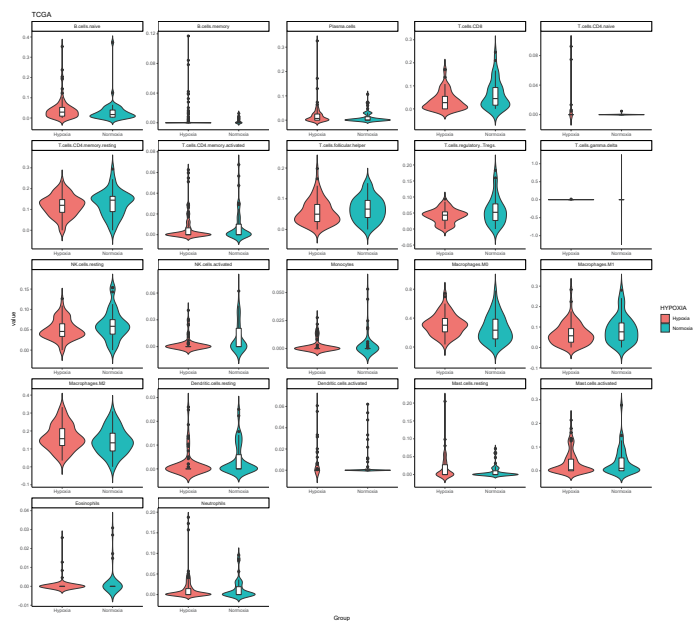

Figure S2. The relative amount of 22 lymphocytes within tumor tissue in GSE14333 (A), GSE17538 (B), GSE39582 (C), and TCGA (D), respectively.
